# Supplementary material
Source: PubMed Central journal article supplement (PMC4805461)
Supplement: NIHMS763935-supplement-Supp_Info.pdf [file NIHMS763935-supplement-Supp_Info.pdf]

# Structure of Serum Amyloid A Suggests a Mechanism for Lipoprotein Binding and Functions: SAA as a Hub in Macromolecular Interaction Networks

Nicholas Frame and Olga Gursky,  
*Physiology & Biophysics, Boston University School of Medicine*

## SUPPLEMENTAL DATA

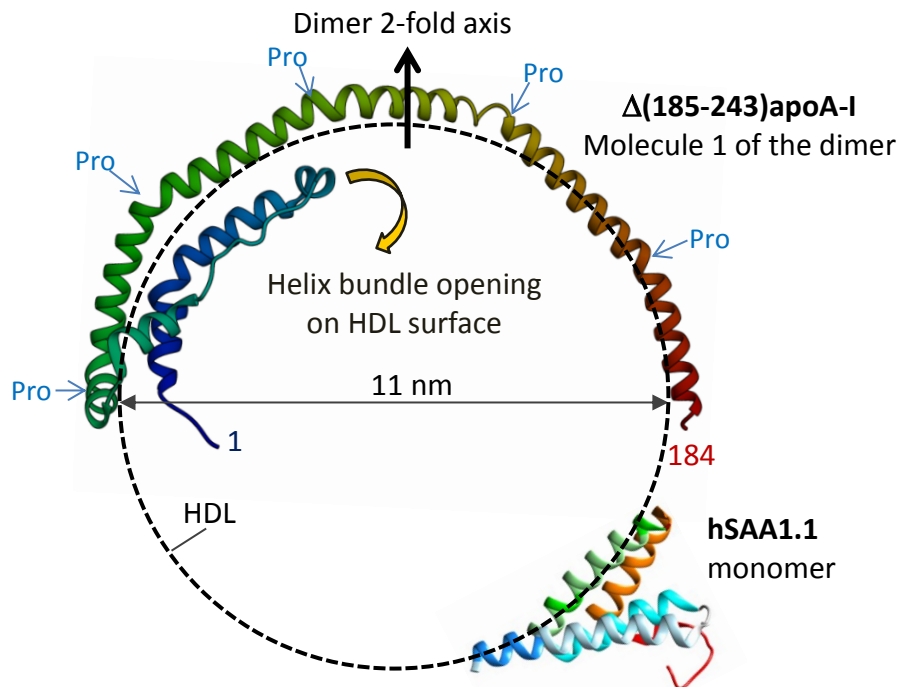

**Figure S1** Structural basis for apoA-I binding to HDL surface: comparison with SAA. ApoA-I, which is the major protein on normal HDL, is partially replaced with SAA on acute-phase HDL. The apoA-I sequence is comprised of 11/22-mer tandem helical repeats punctuated by Pro. Pro-induced helical kinks (shown by arrows) confer the overall molecular curvature that is commensurate with the HDL diameter. X-ray crystal structure of the C-terminally truncated human lipid-free apoA-I,  $\Delta(185-243)$ apoA-I (PDB ID 3R2P) [1] is shown for one molecule from the crystallographic dimer. The highly dynamic hydrophobic C-terminal tail 185-243 (not shown) was truncated to augment crystallization. In the crystal, 1-184 fragment of lipid-free apoA-I dimerizes to form a semi-circular four-helix bundle; three helices come from molecule 1 of the dimer and the fourth from molecule 2 (not shown). The dimer two-fold axis is indicated. Upon HDL binding, two N-terminal helical segments (in dark blue and teal) rotate around the flexible hinge away from the other apoA-I helices (circular arrow), thereby opening the four-helix bundle to expose the apolar helical faces to the lipid surface. The resulting pairs of helices wrap around the HDL perimeter in an antiparallel “double-belt” conformation [2]. A similar mode of protein-lipid surface binding was inferred for other apolipoproteins. It is distinctly different from the proposed binding mode of SAA monomer to HDL, in which the relative orientation of helices 1 and 3 is similar to that observed in the crystal structures of lipid-free SAA (illustrated at the bottom, PDB ID 4IP8).

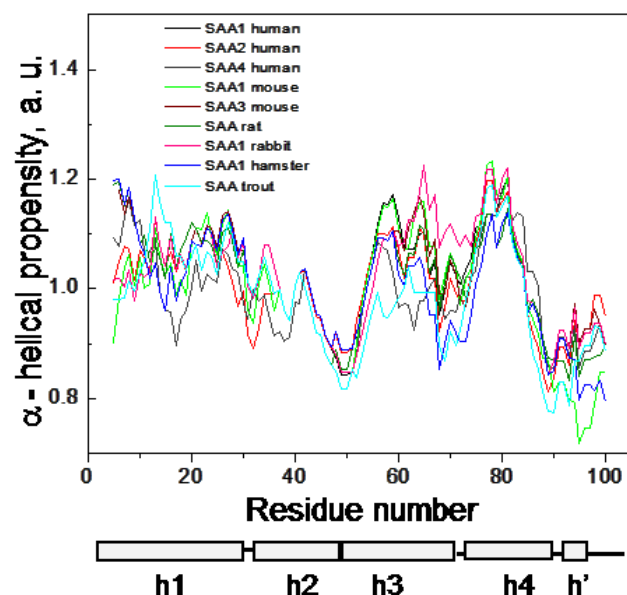

**Figure S2** Alpha-helical propensity of selected SAA proteins obtained by using the ExPASy server with Levitt's algorithm [3]. Other methods (e. g. Deleage and Roux, [4]) yielded similar profiles. Secondary structural elements observed by x-ray crystallography in lipid-free oligomeric hSAA1.1 and mSAA3 are shown at the bottom: rectangles –  $\alpha$ -helices; lines – non-helical structure.

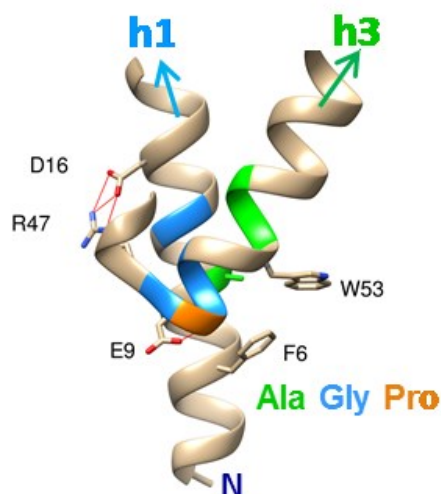

**Figure S3** Specific interactions between conserved residues near the h1-h3 helical junction which contribute to the relative packing of these helices at an  $\sim 45^\circ$  angle. A part of hSAA1.1 structure (PDB ID 4IP8) that encompasses h1, h2-h3 linker and h3 is shown. Main chains of the strictly conserved Gly, Ala and Pro groups that facilitate close helical spacing are color-coded to show A10, G13, G48, P49, G50, G51, A54, and A55. Main chains of A10 and G50 are packed unusually close to each other, with only a  $3.6\text{\AA}$  distance between A10  $C_\alpha$  and G50 C, a  $3.6\text{\AA}$  distance between A10 N and G50 C, and a  $4.0\text{\AA}$  distance between A10  $C_\alpha$  and G50  $C_\alpha$ . Selected side chains involved in h1-h3 packing in this region are shown. Their interactions include aromatic stacking (F6 – W53), a salt bridge (D16 – R47), and an H-bond ( $\text{COO}^-$  of E9 to the main chain N of G50). All these residues are highly conserved in the SAA family (Fig. 2).

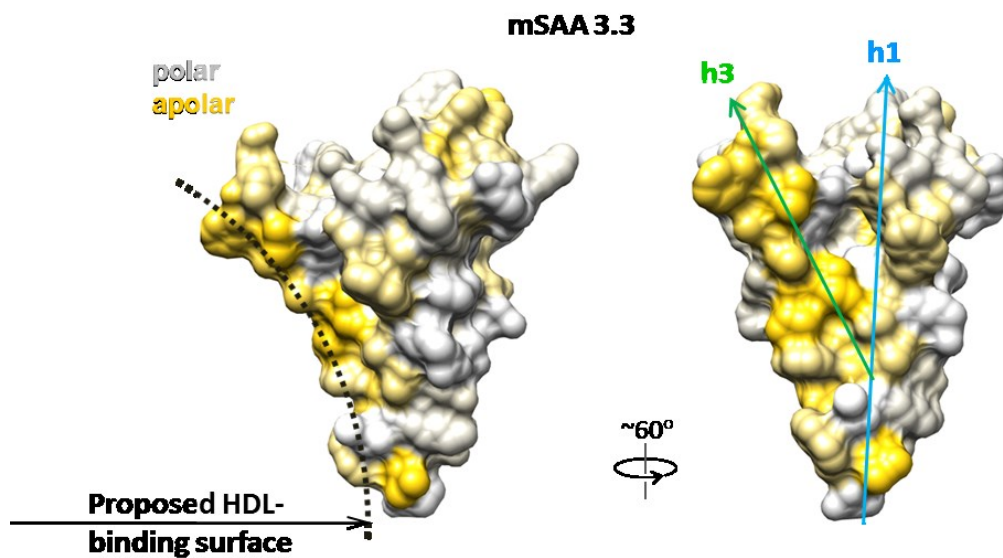

**Figure S4** Space-filling model of murine SAA3.3 (PDB ID 4Q5G) showing surface hydrophobicity.

#### References

1. Borhani, D. W., Rogers, D. P., Engler, J. A., Brouillette, C. G. (1997) Crystal structure of truncated human apolipoprotein A-I suggests a lipid-bound conformation. *Proc. Natl. Acad. Sci. USA* 94(23), 12291-12296.
2. Mei, X., Atkinson, D. (2011) Crystal structure of C-terminal truncated apolipoprotein A-I reveals the assembly of high density lipoprotein (HDL) by dimerization. *J. Biol. Chem.* 286(44), 38570-38582.
3. Levitt, M. (1978) Conformational preferences of amino acids in globular proteins. *Biochemistry.* 17(20), 4277-4285.
4. Deleage, G., Roux, B. (1987) An algorithm for protein secondary structure prediction based on class prediction. *Protein Engineering* 1, 289-294.
